# Supplementary material
Source: Copernicus journal article supplement (doi:10.5194/wcd-7-743-2026)
Supplement: Supplementary file 1 [file wcd-7-743-2026-supplement.pdf]

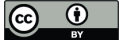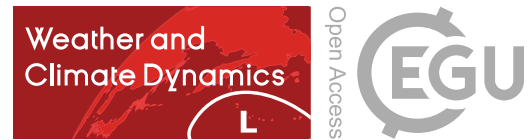

*Supplement of*

## **Impacts of orography and urbanization on extreme precipitation event in Beijing during 2023**

**Haobo Cui et al.**

*Correspondence to:* Guocan Wu (gcwu@bnu.edu.cn)

The copyright of individual parts of the supplement might differ from the article licence.

9 **Supplementary Information**

10

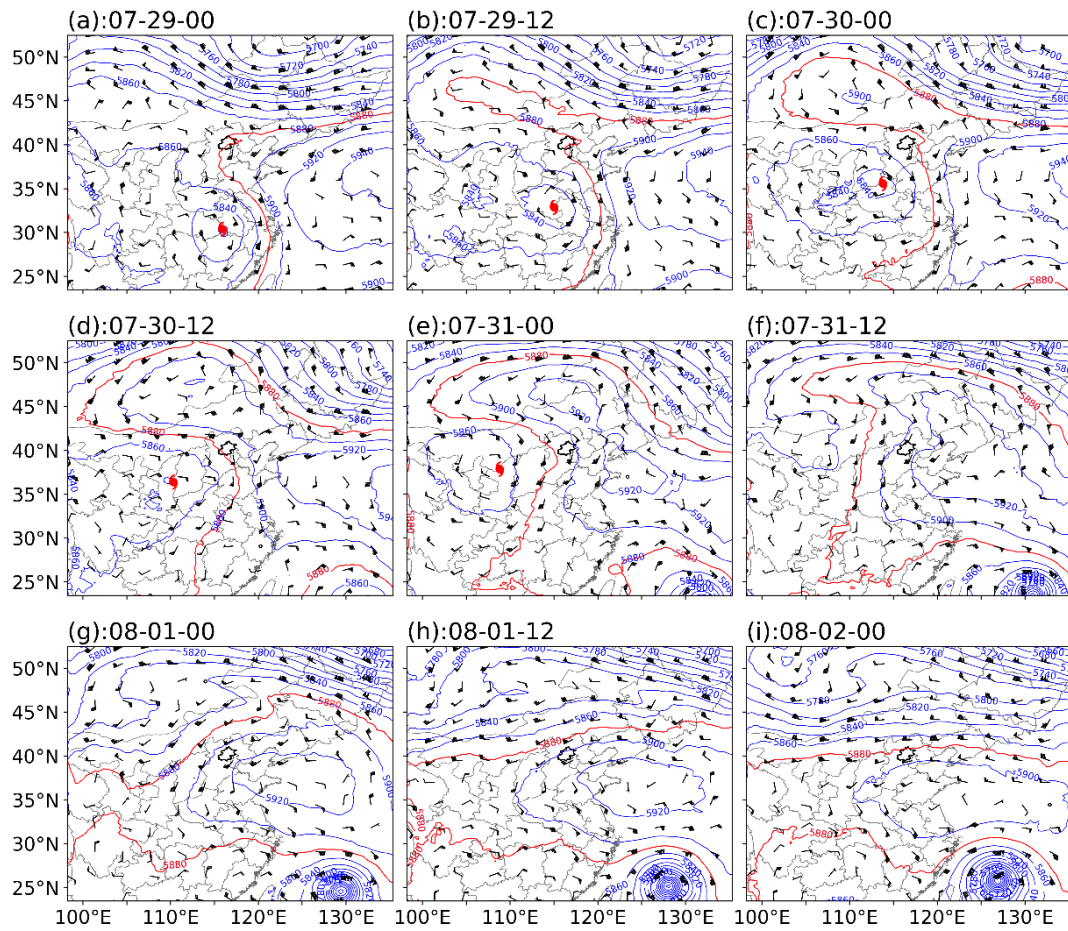

11

12 **Figure S1:** 500 hpa circulation pattern for the precipitation event of LU\_2020 from WRF model.

13 The blue solid lines represent geopotential height contours; the red solid contours represent position of subtropical high; the typhoon symbols in (a) - (e) represent residual circulation center of typhoon

14 Doksuri.

15

16

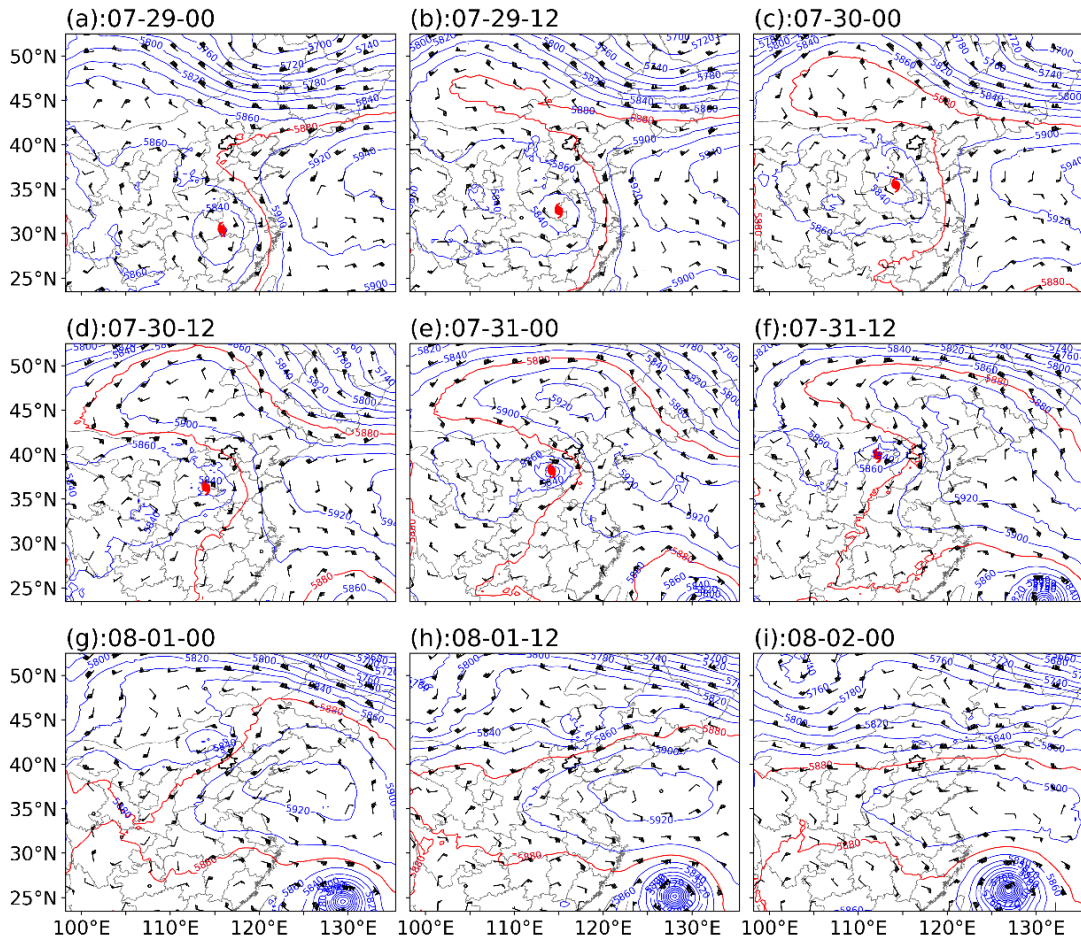

17

18 **Figure S2:** 500 hpa circulation pattern for the precipitation event of LU\_nohgt from WRF model.  
 19 The blue solid lines represent geopotential height contours; the red solid contours represent position  
 20 of subtropical high; the typhoon symbols in (a) - (e) represent residual circulation center of typhoon  
 21 Doksuri.

22

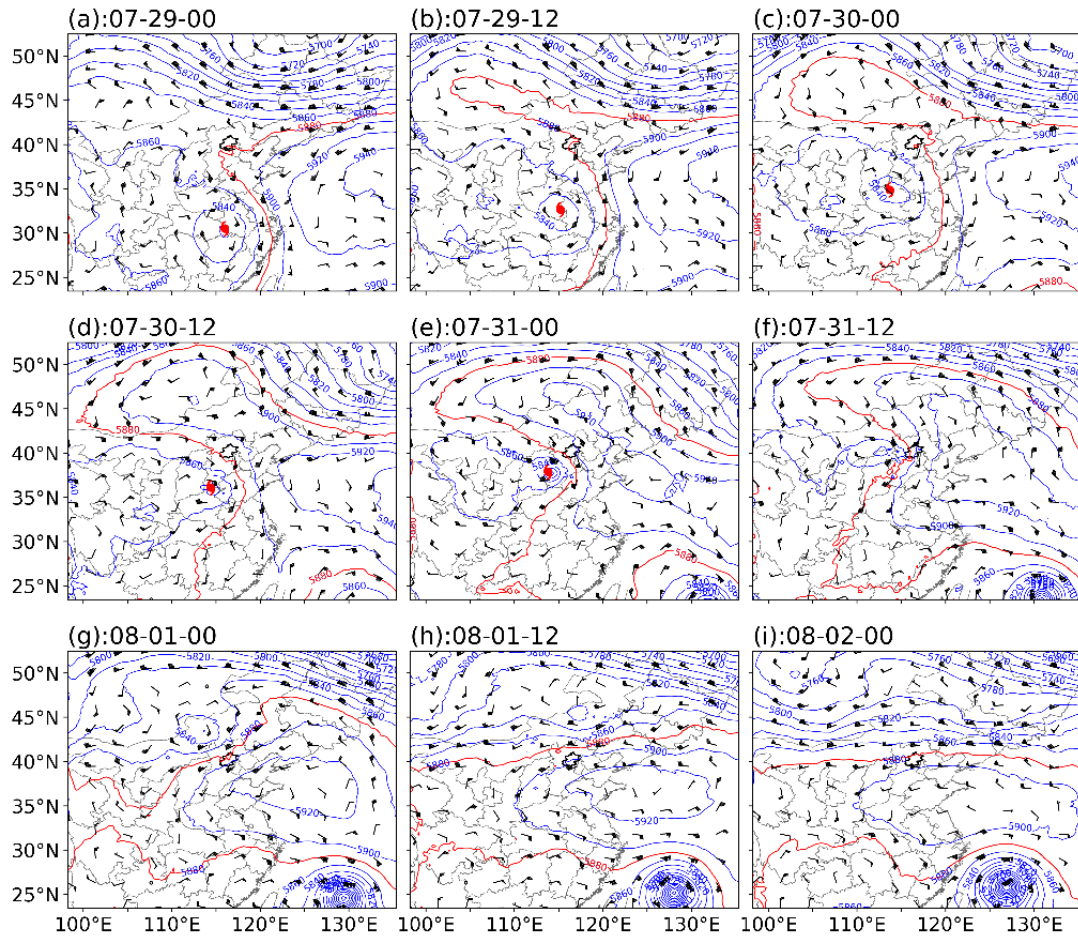

23  
24  
25  
26  
27  
28

**Figure S3:** 500 hpa circulation pattern for the precipitation event of LU\_nourb from WRF model. The blue solid lines represent geopotential height contours; the red solid contours represent position of subtropical high; the typhoon symbols in (a) - (e) represent residual circulation center of typhoon Doksuri.

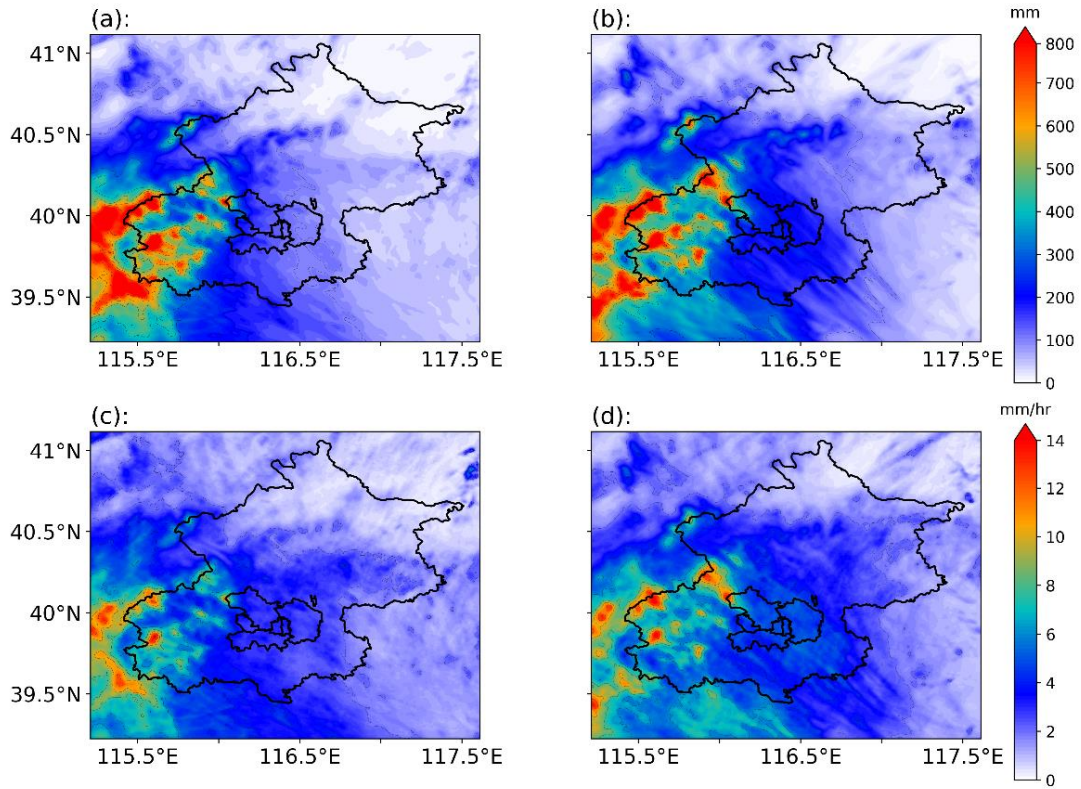

29

30 **Figure S4:** Comparison between simulated results of the events. (a), (b) represents the accumulated  
 31 precipitation amount of LU\_2020 experiment and 10 members ensemble mean, while (c), (d)  
 32 represents the corresponding intensity simulation, respectively.

33

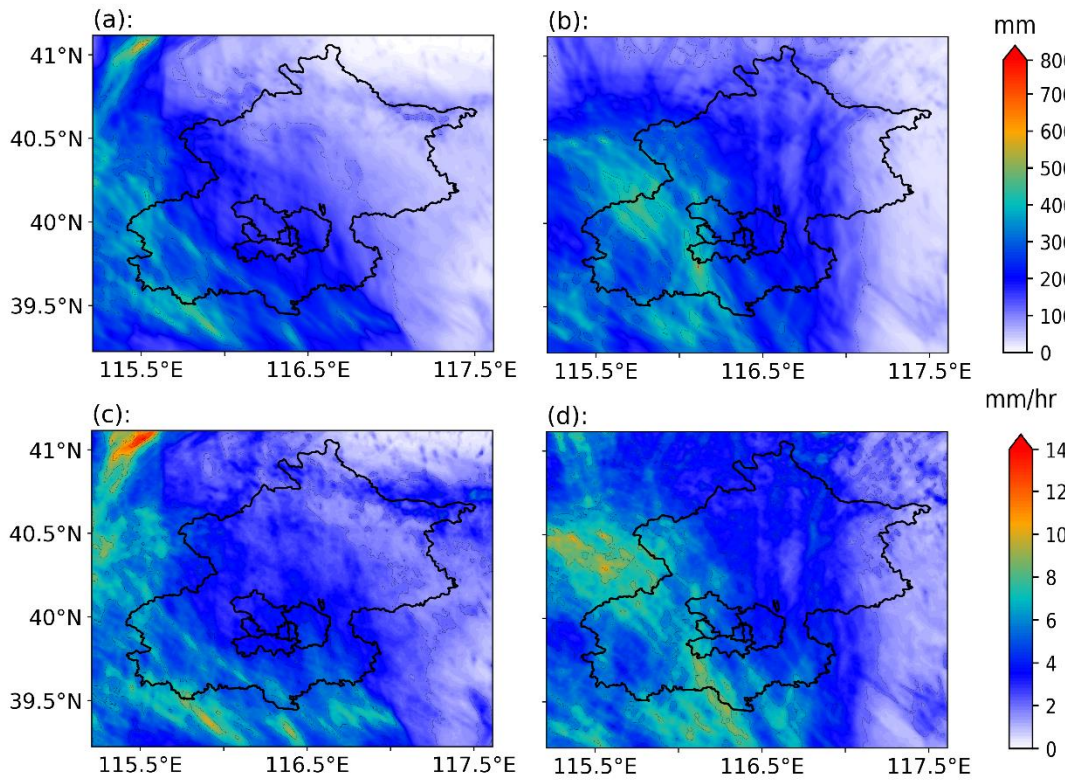

34

35 **Figure S5:** Accumulated precipitation and intensity distribution of the simulated results. (a), (b)  
 36 represents the accumulated precipitation amount of 100 m removal experiment and 0 m removal  
 37 experiment, while (c), (d) represents the corresponding precipitation intensity, respectively.

38

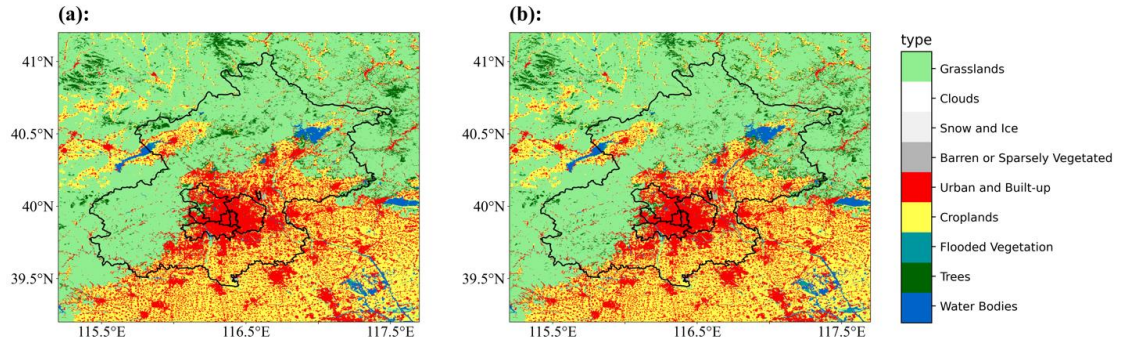

39

40 **Figure S6:** Comparison between land cover type in 2020 (a) and 2023 (b) in Beijing region from  
 41 Sentinel-2.

42
